# Supplementary material for: Evaluation of the prognostic value of GDF-15, ABC-AF-bleeding score and ABC-AF-death score in patients with atrial fibrillation across different geographical areas
Source: PubMed Central journal article supplement (PMC7986788; doi:10.1136/openhrt-2020-001471), 2021-03-19
Supplement: openhrt-2020-001471supp001.pdf [file openhrt-2020-001471supp001.pdf]

## Supplementary material

### Evaluation of the prognostic value of GDF-15 and ABC-AF scores in different geographical areas

Tymon Pol, M.D., Ziad Hijazi, M.D., Ph.D., Johan Lindbäck, M.Sc., John H. Alexander, M.D., M.H.S., M. Cecilia Bahit, M.D., Raffaele De Caterina, M.D., Ph.D., John W. Eikelboom, M.D., Ph.D., Michael D. Ezekowitz M.D., Ph.D., Bernard J. Gersh, M.B, Ch.B., D.Phil., Christopher B. Granger, M.D., Elaine M. Hylek M.D., Ph.D., Renato D. Lopes, M.D., Ph.D., Agneta Siegbahn, M.D., Ph.D. and Lars Wallentin, M.D., Ph.D.

## Contents

|                                     |   |
|-------------------------------------|---|
| <b>Supplementary Figure 1</b> ..... | 2 |
| <b>Supplementary Table 1</b> .....  | 3 |
| <b>Supplementary Table 2</b> .....  | 5 |

**Supplementary Figure 1.**

List of all included countries from both the ARISTOTLE and the RE-LY trial.

| <b>ARISTOTLE</b>     | <b>RELY</b>          |
|----------------------|----------------------|
| <b>ASIA/PACIFIC</b>  | <b>ASIA</b>          |
| Australia            | China                |
| China                | Hong Kong            |
| Hong Kong            | India                |
| India                | Japan                |
| Japan                | Malaysia             |
| Malaysia             | Philippines          |
| Philippines          | Singapore            |
| Singapore            | South Korea          |
| South Korea          | Taiwan               |
| Taiwan               | Thailand             |
| <b>EUROPE</b>        | <b>EUROPE</b>        |
| Austria              | Austria              |
| Belgium              | Belgium              |
| Czech                | Bulgaria             |
| Denmark              | Czech                |
| Finland              | Denmark              |
| France               | Finland              |
| Germany              | France               |
| Hungary              | Germany              |
| Israel               | Greece               |
| Italy                | Hungary              |
| Netherlands          | Italy                |
| Norway               | Netherlands          |
| Poland               | Norway               |
| Romania              | Poland               |
| Russia               | Portugal             |
| South Africa         | Romania              |
| Spain                | Russia               |
| Sweden               | Slovakia             |
| Turkey               | Spain                |
| UK                   | Sweden               |
| Ukraine              | Switzerland          |
| <b>LATIN AMERICA</b> | <b>LATIN AMERICA</b> |
| Argentina            | Turkey               |
| Brazil               | Ukraine              |
| Chile                | UK                   |
| Colombia             | <b>LATIN AMERICA</b> |
| Mexico               | Argentina            |
| Peru                 | Brazil               |
| Puerto Rico          | Colombia             |
| <b>NORTH AMERICA</b> | Mexico               |
| Canada               | Peru                 |
| USA                  | <b>NORTH AMERICA</b> |
|                      | Canada               |
|                      | USA                  |
|                      | <b>OTHER</b>         |
|                      | Australia            |
|                      | Israel               |
|                      | South Africa         |

**Supplementary Table 1.** Baseline characteristics of the 14949 patients in the ARISTOTLE cohort according to study region.

|                                          | <b>ASIA/PACIFIC</b><br><i>N</i> = 2389 | <b>EUROPE</b><br><i>N</i> = 6027 | <b>LATIN AMERICA</b><br><i>N</i> = 2959 | <b>NORTH AMERICA</b><br><i>N</i> = 3574 |
|------------------------------------------|----------------------------------------|----------------------------------|-----------------------------------------|-----------------------------------------|
| Age, Median (Q1 - Q3)                    | 69.0 (61.0 - 75.0)                     | 69.0 (62.0 - 75.0)               | 70.0 (64.0 - 77.0)                      | 72.0 (65.0 - 78.0)                      |
| Female                                   | 35.7% (853)                            | 37.1% (2235)                     | 38.0% (1125)                            | 31.0% (1109)                            |
| BMI, Median (Q1 - Q3)                    | 25.1 (22.6 - 28.0) [7]                 | 29.1 (26.1 - 32.8) [21]          | 28.7 (25.4 - 32.6) [24]                 | 30.2 (26.5 - 35.0) [19]                 |
| Systolic blood pressure Median (Q1 - Q3) | 130.0 (120.0 - 140.0) [8]              | 133.0 (123.0 - 143.0) [12]       | 130.0 (120.0 - 140.0) [2]               | 128.0 (117.0 - 138.0) [10]              |
| Diabetes                                 | 24.7% (589)                            | 22.7% (1370)                     | 20.1% (595)                             | 31.7% (1133)                            |
| Hypertension                             | 81.0% (1936)                           | 89.8% (5414)                     | 88.8% (2629)                            | 86.9% (3105)                            |
| Smoker                                   | 8.4% (200) [1]                         | 9.9% (593) [9]                   | 5.6% (166) [4]                          | 7.2% (258) [0]                          |
| Permanent or persistent AF               | 89.6% (2141) [0]                       | 80.8% (4867) [1]                 | 91.5% (2706) [1]                        | 83.2% (2973) [1]                        |
| Stroke/TIA                               | 26.7% (637)                            | 19.0% (1148)                     | 15.3% (454)                             | 15.8% (565)                             |
| Prior bleeding                           | 15.8% (377)                            | 12.1% (732)                      | 13.2% (392)                             | 26.1% (932)                             |
| Prior anemia                             | 3.8% (90) [0]                          | 4.9% (298) [3]                   | 3.5% (104) [6]                          | 14.4% (514) [2]                         |
| Congestive heart failure                 | 24.9% (596)                            | 40.8% (2458)                     | 33.4% (989)                             | 16.8% (601)                             |

|                                                        |                               |                              |                              |                               |
|--------------------------------------------------------|-------------------------------|------------------------------|------------------------------|-------------------------------|
| Myocardial infarction                                  | 8.2% (196) [0]                | 15.0% (906) [0]              | 9.5% (280) [1]               | 15.2% (542) [0]               |
| Peripheral arterial disease                            | 2.5% (59) [0]                 | 5.3% (317) [0]               | 3.7% (109) [1]               | 6.8% (244) [0]                |
| CKD-EPI (mL/min/1.73m <sup>2</sup> ), Median (Q1 - Q3) | 59.0 (47.2 - 72.8) [1]        | 56.5 (46.4 - 67.8) [7]       | 57.0 (45.5 - 70.5) [0]       | 52.4 (42.1 - 63.2) [0]        |
| GDF-15 (ng/L), Median (Q1 - Q3)                        | 1476.5 (1049.8 - 2167.5) [29] | 1263.0 (919.5 - 1865.0) [88] | 1362.0 (973.0 - 2012.0) [34] | 1559.0 (1074.5 - 2297.5) [31] |
| Haemoglobin (g/dL), Median (Q1 - Q3)                   | 14.1 (13.0 - 15.3) [13]       | 14.3 (13.3 - 15.3) [13]      | 14.4 (13.4 - 15.5) [26]      | 14.1 (13.0 - 15.0) [18]       |
| NT-proBNP (ng/L), Median (Q1 - Q3)                     | 725.0 (377.8 - 1220.2) [13]   | 695.0 (339.2 - 1244.0) [57]  | 751.0 (397.0 - 1325.0) [10]  | 706.0 (370.0 - 1217.8) [8]    |
| hs-cTnI (ng/L), Median (Q1 - Q3)                       | 5.1 (3.0 - 10.4) [26]         | 5.3 (3.3 - 9.7) [91]         | 6.6 (3.8 - 12.8) [16]        | 4.9 (2.9 - 8.7) [26]          |
| hs-cTnT (ng/L), Median (Q1 - Q3)                       | 9.8 (7.0 - 14.7) [12]         | 10.8 (7.4 - 16.3) [53]       | 11.4 (7.9 - 17.6) [9]        | 11.7 (7.9 - 17.6) [9]         |
| <b>Outcomes</b>                                        |                               |                              |                              |                               |
| Death                                                  | 152 (6%)                      | 330 (5%)                     | 332 (11%)                    | 245 (7%)                      |
| Major bleeding                                         | 130 (5%)                      | 206 (3%)                     | 138 (5%)                     | 195 (5%)                      |
| Missing GDF-15                                         | 28 (1%)                       | 88 (1%)                      | 34 (1%)                      | 31 (1%)                       |

AF indicates atrial fibrillation; BMI, body mass index; CKD-EPI, Chronic Kidney Disease Epidemiology Collaboration equation; Interleukin-6;

Q, quartile; TIA, transient ischemic attack and number in brackets represents number of missings.

**Supplementary Table 2.** Baseline characteristics of the 9369 patients in the RE-LY cohort according to study region.

|                                           | <b>ASIA</b><br>N = 891    | <b>EUROPE</b><br>N = 5024 | <b>LATIN AMERICA</b><br>N = 629 | <b>NORTH AMERICA</b><br>N = 2082 | <b>OTHER</b><br>N = 743   |
|-------------------------------------------|---------------------------|---------------------------|---------------------------------|----------------------------------|---------------------------|
| Age, Median (Q1 - Q3)                     | 69.0 (63.0 - 75.0)        | 72.0 (66.0 - 77.0)        | 73.0 (67.0 - 78.0)              | 74.0 (68.0 - 79.0)               | 74.0 (69.0 - 79.0)        |
| Female                                    | 32.9% (293)               | 36.9% (1855)              | 40.1% (252)                     | 34.1% (711)                      | 40.0% (297)               |
| BMI, Median (Q1 - Q3)                     | 24.3 (22.0 - 27.0) [3]    | 28.1 (25.4 - 31.4) [1]    | 27.9 (25.3 - 31.6) [0]          | 29.0 (25.7 - 33.3) [3]           | 28.4 (25.3 - 31.6) [0]    |
| Systolic blood pressure, Median (Q1 - Q3) | 130.0 (120.0 - 140.0) [2] | 132.0 (120.0 - 145.0) [8] | 131.0 (120.0 - 144.0) [0]       | 128.0 (118.0 - 140.0) [2]        | 130.0 (120.0 - 143.8) [1] |
| Diabetes                                  | 25.3% (225)               | 20.4% (1024)              | 16.2% (102)                     | 24.4% (509)                      | 29.5% (219)               |
| Hypertension                              | 71.6% (638)               | 78.7% (3954)              | 82.0% (516)                     | 81.4% (1694)                     | 79.3% (589)               |
| Smoker                                    | 8.4% (75)                 | 8.6% (432)                | 4.8% (30)                       | 6.3% (132)                       | 7.0% (52)                 |
| Permanent or persistent AF                | 69.7% (621) [0]           | 71.3% (3580) [0]          | 87.3% (549) [0]                 | 55.2% (1147) [4]                 | 58.7% (436) [0]           |
| Stroke/TIA                                | 29.4% (262)               | 18.8% (944)               | 14.9% (94)                      | 16.8% (349)                      | 23.4% (174)               |
| Anemia                                    | 22.2% (198)               | 10.2% (513)               | 7.5% (47)                       | 14.0% (291)                      | 18.0% (134)               |
| Congestive heart failure                  | 34.9% (311) [0]           | 33.8% (1696) [0]          | 33.9% (213) [0]                 | 16.0% (334) [1]                  | 21.1% (157) [0]           |
| Myocardial infarction                     | 10.2% (91)                | 17.2% (864)               | 7.5% (47)                       | 19.6% (408)                      | 24.1% (179)               |

|                                                        |                               |                                |                               |                                |                               |
|--------------------------------------------------------|-------------------------------|--------------------------------|-------------------------------|--------------------------------|-------------------------------|
| Peripheral arterial disease                            | 0.4% (4) [0]                  | 3.8% (193) [0]                 | 2.2% (14) [0]                 | 5.0% (105) [0]                 | 3.9% (29) [1]                 |
| CKD-EPI (mL/min/1.73m <sup>2</sup> ), Median (Q1 - Q3) | 70.7 (58.5 - 85.4) [0]        | 65.5 (54.5 - 76.9) [75]        | 57.9 (47.5 - 68.3) [0]        | 64.2 (53.3 - 76.4) [8]         | 63.1 (52.2 - 75.2) [8]        |
| GDF-15 (ng/L), Median (Q1 - Q3)                        | 1606.0 (1181.5 - 2407.5) [76] | 1436.0 (1060.0 - 2067.0) [365] | 1545.0 (1142.2 - 2081.2) [19] | 1608.0 (1182.0 - 2332.0) [171] | 1744.5 (1231.5 - 2605.8) [87] |
| Hemoglobin (g/dL), Median (Q1 - Q3)                    | 13.9 (12.7 - 15.1) [3]        | 14.4 (13.4 - 15.4) [103]       | 14.4 (13.4 - 15.5) [4]        | 14.1 (13.1 - 15.1) [29]        | 14.0 (12.8 - 15.0) [20]       |
| NT-proBNP (ng/L), Median (Q1 - Q3)                     | 807.0 (400.5 - 1576.5) [3]    | 837.0 (396.0 - 1477.0) [35]    | 819.0 (453.0 - 1410.0) [8]    | 748.0 (368.5 - 1354.0) [19]    | 854.0 (372.5 - 1406.5) [8]    |
| hs-cTnI (ng/L), Median (Q1 - Q3)                       | 6.8 (4.2 - 14.8) [33]         | 7.2 (4.7 - 13.0) [290]         | 7.3 (4.4 - 14.0) [18]         | 5.6 (3.5 - 10.0) [102]         | 7.4 (4.5 - 15.0) [11]         |
| hs-cTnT (ng/L), Median (Q1 - Q3)                       | 10.8 (7.1 - 18.0) [39]        | 12.2 (7.7 - 19.5) [385]        | 12.9 (8.3 - 20.0) [21]        | 12.0 (7.6 - 19.0) [121]        | 13.8 (8.5 - 22.8) [84]        |
| <b>Outcomes</b>                                        |                               |                                |                               |                                |                               |
| Death                                                  | 66 (7%)                       | 341 (7%)                       | 54 (9%)                       | 104 (5%)                       | 42 (6%)                       |
| Major bleeding                                         | 38 (4%)                       | 210 (4%)                       | 29 (5%)                       | 151 (7%)                       | 46 (6%)                       |
| Missing GDF-15                                         | 76 (9%)                       | 365 (7%)                       | 19 (3%)                       | 171 (8%)                       | 87 (12%)                      |

AF indicates atrial fibrillation; BMI, body mass index; CKD-EPI, Chronic Kidney Disease Epidemiology Collaboration equation; Q, quartile; TIA, transient ischemic attack and number in brackets represents number of missings.
